# Supplementary material
Source: MDPI journal article supplement (https://www.mdpi.com/1424-2818/15/10/1055)
Supplement: s1 [file s1]

**Supplementary Material for the article “Plumage Variation and Sex Ratio in the Brown-Backed Parrotlet (*Touit melanonotus*; Psittacidae)”**

**Figure S1** Results of PCRs performed with 29 individuals of *Touit melanonotus*.

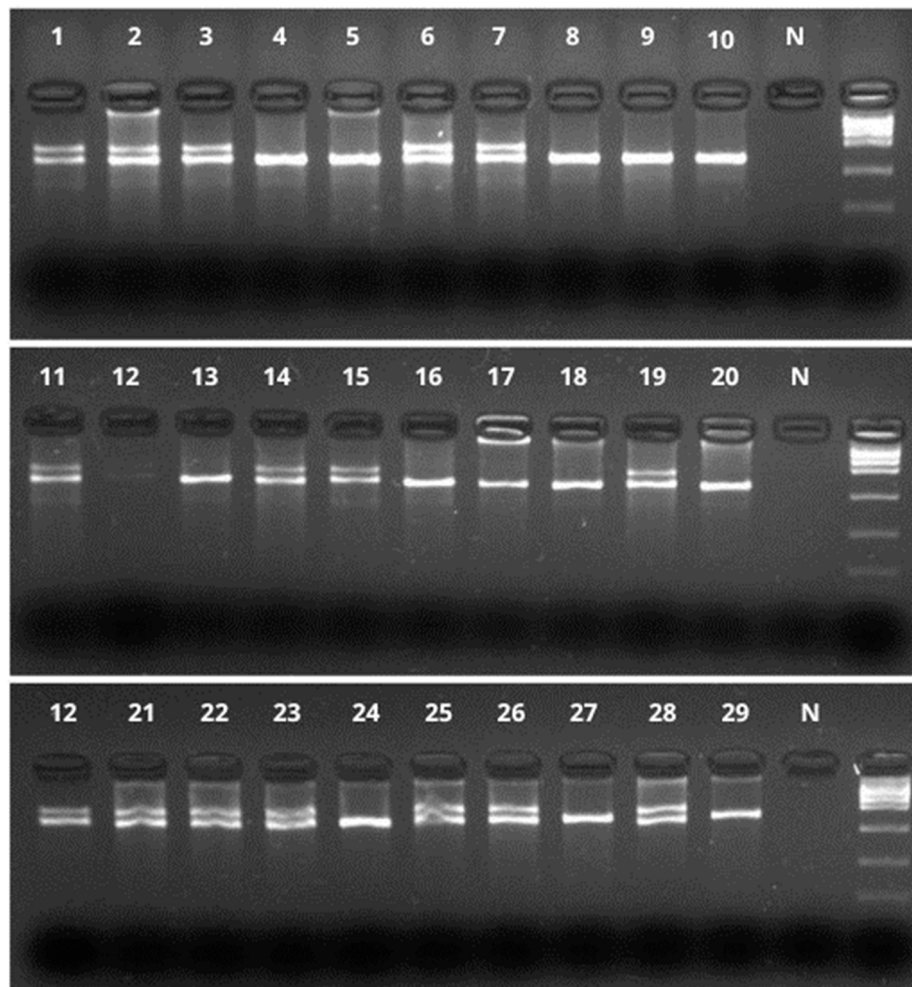

**Legend** According to Han et al. [28], on electrophoretic gels all females show an additional band amplified by P0 and P2, which is ~100 bp larger than the amplified band by P8 and P2. Males have only one band. The sample from individual #12 was sexed twice, due to the unclear result of the first sexing. Numbers represent individuals and “N” represents negative controls.

**Table S1** Literature review about Psittaciformes sex ratio, focusing on Psittacidae.

| Taxon name                  | Common name           | IUCN category | Reference | Captive/wild | Method | Age    | Female<br><i>n</i> = | Male<br><i>n</i> = | Male:<br>female sex<br>ratio | $\chi^2$    |
|-----------------------------|-----------------------|---------------|-----------|--------------|--------|--------|----------------------|--------------------|------------------------------|-------------|
| <i>Ara ararauna</i>         | Blue-and-yellow Macaw | LC            | [31]      | W            | M      | C/N    | 4                    | 5                  | 1.25:1                       | 0.11        |
|                             |                       |               | [32]      | C            | M      | A      | 13                   | 10                 | 0.769:1                      | 0.39        |
| <i>Ara chloropterus</i>     | Red-and-green Macaw   | LC            | [31]      | W            | M      | 16C,1A | 8                    | 9                  | 1.125:1                      | 0.05        |
|                             |                       |               | [33]      | C            | M      | -      | 7                    | 5                  | 0.714:1                      | 0.33        |
| <i>Ara macao</i>            | Scarlet Macaw         | LC            | [34]      | C            | M      | -      | 9                    | 7                  | 0.777:1                      | 0.25        |
| <i>Amazona aestiva</i>      | Blue-fronted Parrot   | NT            | [35]      | W            | M      | -      | 8                    | 24                 | 3:1                          | <b>8.00</b> |
|                             |                       |               | [36]      | W            | M      | A      | 88                   | 114                | 1.29:1                       | 3.34        |
|                             |                       |               | [37]      | W            | M      | C      | 12                   | 9                  | 0.75:1                       | 0.42        |
| <i>Amazona auropalliata</i> | Yellow-naped Amazon   | <b>CR</b>     | [38]      | W            | M      | N      | 38                   | 39                 | 1.026:1                      | 0.03        |
| <i>Amazona finschi</i>      | Lilac-crowned Parrot  | <b>EN</b>     | [39]      | W            | M      | N      | 33                   | 33                 | 1:1                          | 0           |
| <i>Amazona guildingi</i>    | Saint Vincent Amazon  | <b>VU</b>     | [40]      | C            | M      | -      | 38                   | 37                 | 0.97:1                       | 0.03        |

|                                         |                           |           |      |   |   |      |      |      |         |               |
|-----------------------------------------|---------------------------|-----------|------|---|---|------|------|------|---------|---------------|
| <i>Amazona ochrocephala xantholaema</i> | Yellow-crowned Parrot     | LC        | [41] | - | M | -    | 11   | 8    | 0.727:1 | 0.47          |
| <i>Amazona vittata</i>                  | Puerto Rican Parrot       | <b>CR</b> | [42] | W | - | N    | 26   | 31   | 1.192:1 | 0.43          |
| <i>Amazona vinacea</i>                  | Vinaceous-breasted Parrot | <b>EN</b> | [43] | C | - | A    | 8    | 5    | 0.625:1 | 0.69          |
| <i>Anodorhynchus leari</i>              | Lear's Macaw              | <b>EN</b> | [44] | W | M | J, A | -    | -    | -       | -             |
| <i>Anodorhynchus hyacinthinus</i>       | Hyacinth Macaw            | <b>VU</b> | [45] | W | M | F    | 15   | 13   | 0.866:1 | 0.14          |
|                                         |                           |           | [46] | W | M | N    | -    | -    | ~ 1:1   | -             |
|                                         |                           |           | [47] | C | M |      | 15   | 14   | 0.933:1 | 0.03          |
|                                         |                           |           | [48] | W | M | N    | 54   | 37   | 0.685:1 | 3.17          |
|                                         |                           |           | [49] | W | M | F/N  | 54   | 51   | 0.944:1 | 0.08          |
| <i>Eupsittula aurea</i>                 | Peach-fronted Parakeet    | LC        | [50] | C | - | -    | 24   | 16   | 0.666:1 | 1.6           |
| <i>Forpus passerinus</i>                | Green-rumped Parrotlet    | LC        | [51] | W | O | A    | 442  | 671  | 1.518:1 | <b>47.11</b>  |
|                                         |                           |           | [52] | W | O | C, A | 939  | 1656 | 1.763:1 | <b>198.10</b> |
|                                         |                           |           | [53] | W | O | N    | 1341 | 1387 | 1.03:1  | 0.78          |
|                                         |                           |           | [54] | W | O | J    | 115  | 214  | 1.860:1 | <b>29.79</b>  |
| <i>Psittacara leucophthalmus</i>        | White-eyed Parakeet       | LC        | [43] | C | - | A    | 9    | 3    | 0.333:1 | 3             |

|                                  |                       |           |      |         |         |   |    |    |         |              |
|----------------------------------|-----------------------|-----------|------|---------|---------|---|----|----|---------|--------------|
| <i>Psittacus erithacus</i>       | Gray Parrot           | <b>EN</b> | [55] | 23W, 4C | -       | A | 13 | 14 | 1.076:1 | 0.03         |
|                                  |                       |           |      | W       | -       | A | 16 | 8  | 0.5:1   | 2.66         |
|                                  |                       |           | [56] | C       | -       | A | 15 | 18 | 1.2:1   | 0.27         |
| <i>Poicephalus robustus</i>      | Cape Parrot           | <b>VU</b> | [57] | C       | O, M, L | A | 2  | 2  | 1:1     | 0            |
| <i>Poicephalus cryptoxanthus</i> | Brown-headed Parrot   | LC        |      |         |         |   | 3  | 4  | 1.333:1 | 0.14         |
| <i>Poicephalus meyeri</i>        | Meyer's Parrot        | LC        |      |         |         |   | 4  | 6  | 1.5:1   | 0.4          |
| <i>Poicephalus rufiventris</i>   | Orange-bellied Parrot | LC        |      |         |         |   | 3  | 3  | 1:1     | 0            |
| <i>Poicephalus senegalus</i>     | Senegal Parrot        | LC        |      |         |         |   | 5  | 4  | 0.8:1   | 0.11         |
| <i>Poicephalus gulielmi</i>      | Red-fronted Parrot    | LC        |      |         |         |   | 2  | 2  | 1:1     | 0            |
| <i>Primolius couloni</i>         | Blue-headed Macaw     | <b>VU</b> | [58] | C       | M       | - | 4  | 35 | 8.75:1  | <b>24.64</b> |
| <i>Myiopsitta monachus</i>       | Monk Parakeet         | LC        | [59] | W       | L       | A | 36 | 32 | 0.888:1 | 0.26         |
|                                  |                       |           | [60] | W       | M       | A | 30 | 30 | 1:1     | 0            |
|                                  |                       |           |      | W       | M       | N | 27 | 23 | 0.851:1 | 0.32         |

**Legend** In “Captive/Wild”: **W** = wild; **C** = captive. In “Method”: **M** = molecular; **O** = observational; **L** = laparotomy; In “Age”: **C** = chicks; **N** = nestlings; **F** = fledglings; **A** = adults. IUCN categories: **LC** - Least Concern; **NT**: Near Threatened; **VU**: Vulnerable; **EN**: Endangered; **CR**: Critically Endangered. “-” = data not available. Bold  $\chi^2$  numbers are the ones with significant deviations from equality. This table was inspired by the one published by Taylor & Parkin [54], and we excluded the data already provided by the authors. Note that some studies contain more than one estimate.
